# Supplementary material
Source: PubMed Central journal article supplement (PMC3780907)
Supplement: 1307211110_pnas.201307211SI.pdf [file 1307211110_pnas.201307211SI.pdf]

# Supporting Information

Hu et al. 10.1073/pnas.1307211110

## SI Materials and Methods

**Induction of Diabetes in Mice.** Male C57BL/6J mice and PPAR $\alpha$  KO mice (8 wk old) received daily i.p. injections of STZ (50 mg·kg<sup>-1</sup>·day<sup>-1</sup> in 10 mM citrate buffer, pH 4.5) for 5 d to induce diabetes.

**Immunohistochemistry.** Slides were incubated with an anti-PPAR $\alpha$  antibody (SC-9000, 1:200 dilution; Santa Cruz Biotechnologies) and anti-GFAP antibody (G3893, 1:200 dilution; Sigma-Aldrich). The slides were then incubated with Cy3- or FITC-labeled secondary antibodies (Jackson ImmunoResearch Europe) for 1 h and mounted with Mounting Medium for Fluorescence with DAPI (Vector Laboratories). Human eye sections were stained with the anti-PPAR $\alpha$  antibody only and processed as above.

**Intravitreal Injection.** Rats were anesthetized with a 10:50 mix of ketamine (100 mg/mL) and xylazine (20 mg/mL). The pupils were dilated with topical application of phenylephrine [2.5% (wt/vol)] and tropicamide (1%). A sclerotomy was created ~0.5 mm posterior to the limbus with a blade, and a glass injector (~33 gauge) connected to a syringe filled with 5  $\mu$ L of adenovirus-expressing green fluorescence protein (Ad-GFP) ( $2.5 \times 10^9$  ifu/mL) or the same titer of adenovirus expressing PPAR $\alpha$  (Ad-PPAR $\alpha$ ) was introduced through the sclerotomy into the vitreous cavity.

**Retina Trypsin Digestion Assay.** Dissected retinas were digested with pepsin [5% (wt/vol) pepsin in 0.2% hydrochloric acid] for 30 min, and then with trypsin (1% trypsin in 0.2 M NaF and 0.1 M Tris, pH 7.8) for 2 h. The isolated retinal vasculature was then

stained with PAS and hematoxylin. Images of retinal vasculature were captured at eight random fields (1.08 mm<sup>2</sup>) in each retina. Pericytes and acellular capillaries in the field were counted and averaged within each group.

**Endothelial Cell Migration Assay.** Human retinal capillary endothelial cells (HRCECs) were cultured in six-well plates to confluence. HRCECs were pretreated with 25  $\mu$ M fenofibrate, with the same volume of DMSO as vehicle control, or infected with Ad-GFP (control) or Ad-PPAR $\alpha$  at multiplicity of infection (MOI) of 20 for 24 h. The HRCEC monolayer was scratched by a plastic pipette tip to generate a no-cell zone. After the scratch, the cells were cultured in normal culture medium. Images of no-cell area were taken at 0 and 8 h postscratching in at least four nonoverlapping areas per well. Wound closure was quantified by measuring the width of the no-cell zone using Image J (NIH) software.

**Cell Viability Assay.** The viability of HRCECs was determined by trypan blue dye exclusion assay. Briefly, the cells were plated at a density of  $1 \times 10^4$  in 24-well plates and treated with 25  $\mu$ M fenofibrate with the same volume of DMSO as control, or infected with Ad-PPAR $\alpha$  (MOI = 20), with Ad-GFP (MOI = 20) as control for 24 h. The cells were then cultured in growth medium for 48 h and collected. An aliquot of cell suspension was mixed with an equal volume of 0.4% trypan blue (Life Technologies), and the viable cells were counted under a microscope. Cell viability was analyzed and expressed as % of live cells (without blue staining) in total cells.

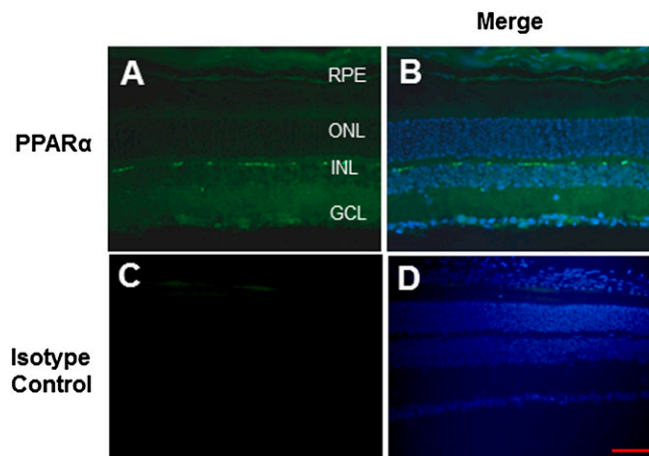

**Fig. S1.** Expression of PPAR $\alpha$  in the mouse retina. Retinal sections from C57/BL6 mice were stained with an anti-PPAR $\alpha$  antibody (A and B) or isotype control (C and D). The nuclei were counterstained with DAPI; shown are merged signals of PPAR $\alpha$  (green) and DAPI staining (blue). (Scale bar, 20  $\mu$ m.) RPE, retinal pigment epithelium; ONL, outer nuclear layer; INL, inner nuclear layer; GCL, ganglion cell layer.



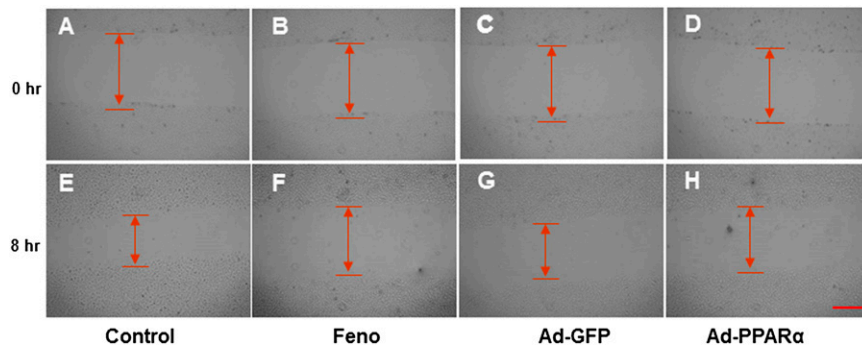

**Fig. 54.** PPAR $\alpha$  overexpression significantly inhibited endothelial cell migration. HRCECs were exposed to 25  $\mu$ M fenofibrate, with DMSO as control or infected with Ad-PPAR $\alpha$  at MOI of 20, with Ad-GFP at MOI of 20 as control, for 24 h and then subjected to in vitro scratch-wound healing assay. Images captured at 0 and 8 h after the scratch using phase-contrast microscope. Representative images from DMSO control group (A and E), fenofibrate treatment group (B and F), Ad-GFP treatment group (C and G), and Ad-PPAR $\alpha$  treatment group (D and H). (Scale bar: 500  $\mu$ m.)

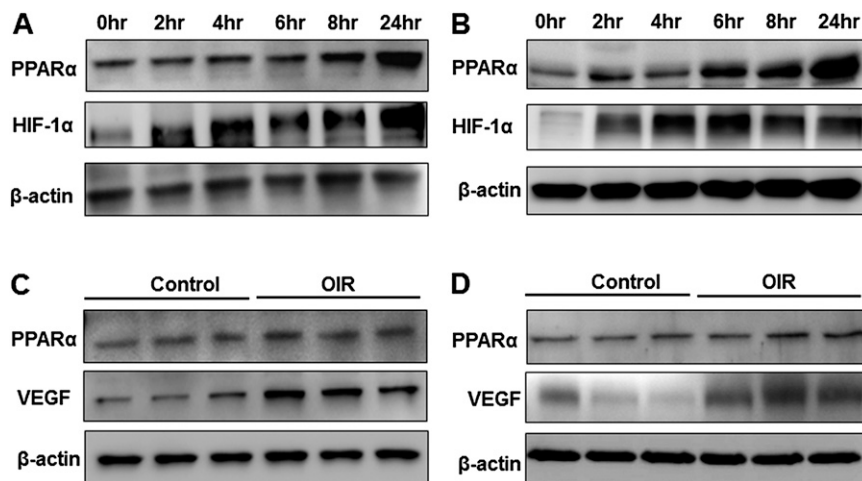

**Fig. 55.** No changes in PPAR $\alpha$  expression in hypoxia-treated retinal cells and in the retinas of OIR mice and rats. (A and B) hTERT RPE (A) and rMC-1 (B) cells were exposed to 100  $\mu$ M CoCl $_2$ . Total cell lysates were used for Western blot analysis of PPAR $\alpha$  and HIF-1 $\alpha$  at the indicated time points of the CoCl $_2$  treatment. (C and D) Mice (C) and rats (D) were exposed to 75% O $_2$  from age of postnatal day 7 (P7) to P12. At P16, the retinas were dissected and homogenized. The same amount (50  $\mu$ g) of retinal proteins was used for Western blot analysis of PPAR $\alpha$  and VEGF in the retinas from normoxia control and OIR mice (C) and normoxia control and OIR rats (D).

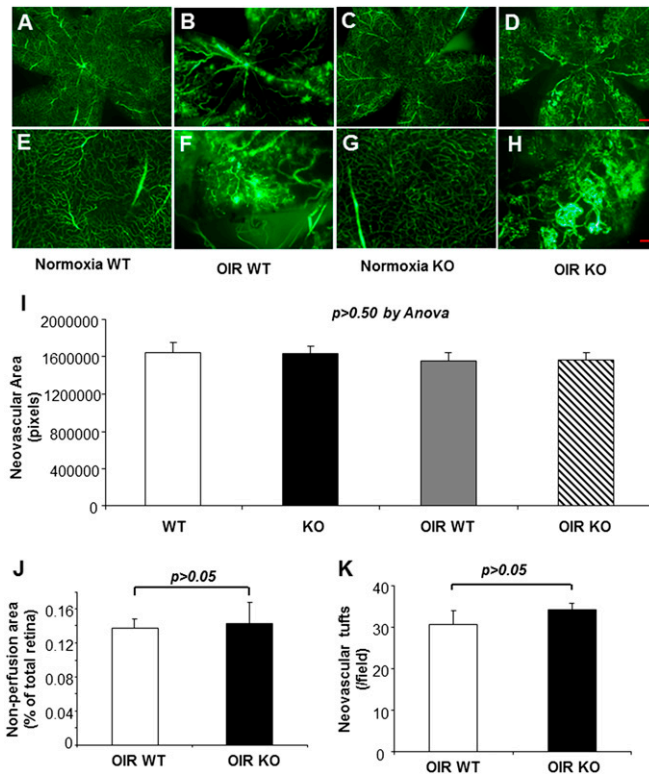

**Fig. 56.** PPAR $\alpha$  KO mice with OIR showed no significant difference in retinal neovascularization compared with OIR WT mice. (A–H) PPAR $\alpha$  KO and WT mice were exposed to 75% O<sub>2</sub> from P7 to P12. At P18, fluorescein angiography was performed with high molecular weight fluorescein-dextran in the whole-mounted retina of normoxia WT mice (A and E), OIR WT mice (B and F), normoxia PPAR $\alpha$  KO mice (C and G), and OIR PPAR $\alpha$  KO mice (D and H). [Scale bars: 100  $\mu$ m (A–D) and 25  $\mu$ m (E–H).] (I–K) Total neovascular areas (I), nonperfused areas (J), and neovascular bulbs per field (K) were measured using software (NIH Image J) in retinal angiographs. The results showed no significant differences in these parameters among these groups (mean  $\pm$  SD,  $n = 6$ , analyzed by ANOVA).

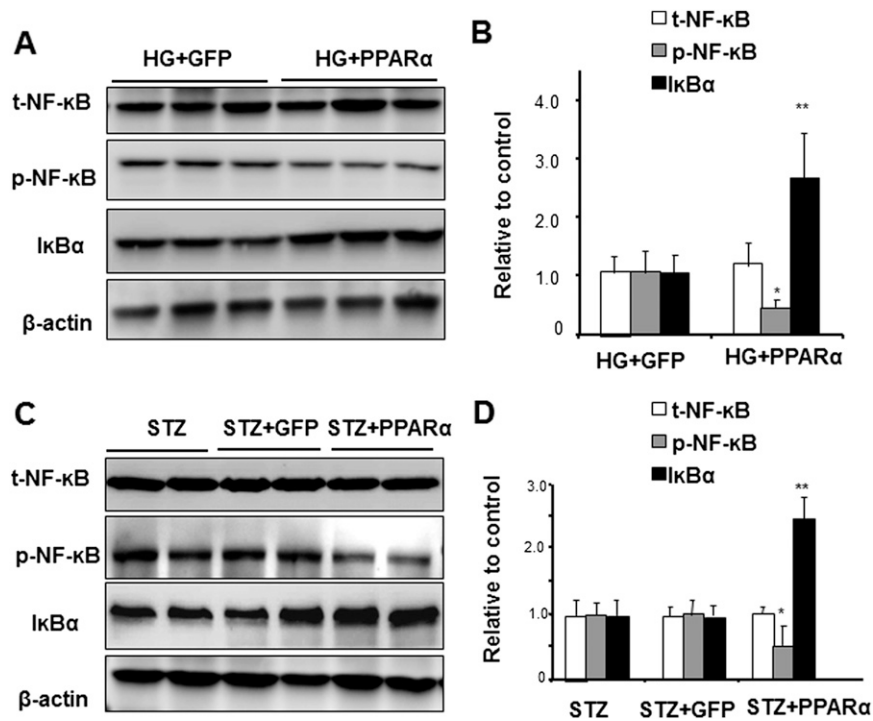

**Fig. S7.** PPAR $\alpha$  overexpression inhibited NF- $\kappa$ B signaling in high glucose-treated retinal cells and in the retina of diabetic rats. (A and B) hTERT RPE cells were exposed to 30 mM D-glucose for 48 h and then infected with Ad-PPAR $\alpha$  at MOI of 20, with Ad-GFP at the same MOI as control. Twenty-four hours following the infection, total cell lysates were used for Western blot analysis of total NF- $\kappa$ B, phospho-NF- $\kappa$ B, and I $\kappa$ B $\alpha$  (A). The results were semiquantified by densitometry and normalized by  $\beta$ -actin levels (B) (mean  $\pm$  SD,  $n = 3$ , \* $P < 0.05$ , \*\* $P < 0.01$ ). (C and D) Diabetic rats with 8 wk of STZ-induced diabetes received an intravitreal injection of Ad-PPAR $\alpha$  or Ad-GFP (control). Four weeks after the injection, the same amount (50  $\mu$ g) of retina proteins was used for Western blot analysis of total NF- $\kappa$ B, phospho-NF- $\kappa$ B, and I $\kappa$ B $\alpha$  (C). These protein levels were semiquantified with densitometry and normalized by  $\beta$ -actin levels (D) (mean  $\pm$  SD,  $n = 4$ , \* $P < 0.05$ , \*\* $P < 0.01$ , compared with the Ad-GFP-treated group).
